# Supplementary material
Source: Elsevier journal article supplement (https://www.sciencedirect.com/science/article/pii/S141386702200040X)
Supplement: mmc1 [file S141386702200040X:mmc1.docx]

**BJID-D-22-00036 – Supplementary Material**

**Supplementary Table. Baseline clinical, laboratory and hospitalization characteristics**

| **Variable** | **Total**  **n= 211** | **Ward**  **n=112** | **ICU**  **n=99** | **p-value** |
| --- | --- | --- | --- | --- |
| **Symptoms n (%)** | | | | |
| Time from symptom onset to hospitalization (days)* | 9.2 (8.6) | 9.9 (10.5) | 8.3 (5.6) | 0.160 |
| Dyspnea | 173 (82.4) | 84 (75.7) | 89 (89.9) | **0.007** |
| Cough | 146 (69.5) | 71 (64.0) | 75 (75.8) | 0.064 |
| Fever | 119 (56.9) | 63 (56.8) | 56 (57.1) | 0.955 |
| Myalgia | 106 (50.5) | 62 (55.9) | 44 (44.4) | 0.099 |
| Alteration in taste | 87 (41.4) | 59 (53.2) | 28 (28.3) | **<0.001** |
| Alteration in olfaction | 80 (38.1) | 52 (46.8) | 28 (28.3) | **0.006** |
| Diarrhea | 57 (27.1) | 37 (33.3) | 20 (20.2) | **0.033** |
| Rhinorrhea | 37 (17.6) | 24 (21.6) | 13 (13.1) | 0.107 |
| Sore throat | 38 (18.1) | 19 (17.1) | 19 (19.2) | 0.697 |
| Abdominal pain | 24 (11.4) | 12 (10.8) | 12 (12.1) | 0.766 |
| **Complications during hospitalization n (%)** | | | | |
| Vascular thrombosis | 29 (13.9) | 9 (8.0) | 20 (20.6) | **0.009** |
| Acute kidney injury | 16 (7.7) | 2 (1.8) | 14 (14.4) | **0.001** |
| Use of antibiotics | 194 (92.8) | 101 (90.2) | 93 (95.9) | 0.111 |
| **Laboratory Tests (mean±SD) or (median IIQ)** | | | | |
| PaO2 / FiO2**‡** | 264.9 (118.8) | 317.4 (108.9) | 210.2 (103.4) | **<0.001** |
| SOFA (first 24h)**‡** | 2.0 (1.0-3.0) | 1.0 (1.0-2.0) | 3.0 (2.0-4.0) | **<0.001**** |
| Total leukocyte (x1000)/mm3‡ | 8.5 (4.2) | 7.9 (4.1) | 9.2 (4.3) | **0.025** |
| Neutrophils (x1000)/mm3‡ | 6.7 (3.7) | 6.1 (3.6) | 7.4 (3.8) | **0.011** |
| Lymphocytes (x1000)/mm3‡ | 1.2 (0.9) | 1.3 (1.0) | 1.1 (0.7) | 0.142 |
| Platelets (x1000)/mm3‡ | 243 (96.0) | 245 (103.0) | 241 (87.8) | 0.741 |
| C-reactive protein (mg/l)‡ | 80.0 (45.2-158.0) | 60.0 (34.7-90.0) | 90.0 (61.0-183.1) | **<0.001**** |
| LDH(U/l)‡ | 358.0 (286.0-452.0) | 309.5 (269.0-390.2) | 414.0 (342.7-555.0) | **<0.001**** |
| Creatinine (mg/dL)‡ | 0.8 (0.6-1.0) | 0.7 (0.6-1.0) | 0.8 (0.6-1.2) | **0.036**** |
| Albumin (mg/dL)§ | 3.4 (0.4) | 3.5 (0.4) | 3.3 (0.4) | **0.001** |
| Bilirubin (mg/dl)† | 0.5 (0.4) | 0.5 (0.2) | 0.6 (0.5) | 0.073 |
| AST (U/l)**§** | 44.0 (34.6-64.0) | 41.5 (31.7-56.0) | 46.0 (37.0-72.0) | **0.006**** |
| ALT (U/l)**§** | 49.8 (47.2) | 43.3 (33.3) | 57.5 (60.4) | **0.040** |
| RNI**‡** | 1.05 (1.0-1.1) | 1.03 (1.0-1.09) | 1.07 (1.0-1.13) | **0.016** |
| D-dimer (mcg/ml)† | 1043.0 (628.0-1644.0) | 967 (597.0-1553.0) | 1187 (646.2-2315.2) | 0.330****** |
| **Percentage of lung involvement on chest CT scan n (%) §** | | | | |
| Normal or<50% | 67 (65.7) | 45 (77.6) | 22 (50.0) | **0.004** |
| >=50% | 35 (34.3) | 13 (22.4) | 22 (50.0) |  |
| **Time Outcomes** | | | | |
| Length of hospital stay (days) | 10 (7.0-16.2) | 8.0 (5.0-10.5) | 16.0 (10.5-24.0) | **<0.001**** |
| Time from discharge to pulmonary function evaluation D45 (days) | 49.5 (34.7) | 52.3 (26.0) | 46.3 (42.3) | 0.209 |
| Interval between discharge and pulmonary function evaluation D180 (days) | 180.7 (34.9) | 185.0 (24.2) | 175.9 (43.6) | 0.059 |
| Interval between pulmonary function evaluation at D45 and D180 (days) | 131.9 (31.2) | 134.0 (29.9) | 129.5 (32.5) | 0.305 |

‡ Missing data (≤ 10%); § Missing data (11-16%); † Missing data (Bilirubin - 25%); (D-dimer - 21%) * Variable presented as mean ± SD; ICU: intensive care unit; SD: standard deviation; SOFA: Sequential Organ Failure Assessment; LDH: lactate dehydrogenase; AST: aspartate aminotransferase; ALT: alanine aminotransferase; INR: international normalized ratio; IIQ: interquartile range ** Non-parametric test - variables presented as median and QII
